1 **Synthetic algal-bacteria consortia for space-efficient**  
2 **microalgal growth in a simple hydrogel system**

3

4 Noah Martin<sup>1\*</sup>, Tatum Bernat<sup>1\*</sup>, Julie Dinasquet<sup>1</sup>, Andrea Stoffko<sup>1</sup>, April Damon<sup>1</sup>, Dimitri D.  
5 Deheyn<sup>1</sup>, Farooq Azam<sup>1</sup>, Jennifer E. Smith<sup>1</sup>, Matthew P. Davey<sup>2,3</sup> Alison G. Smith<sup>2</sup>, Silvia  
6 Vignolini<sup>4</sup>, & Daniel Wangpraseurt<sup>1,4,5#</sup>

7

8 <sup>1</sup>Marine Biology Research Division, Scripps Institution of Oceanography, University of California  
9 San Diego, La Jolla, California 92093-0205, USA

10 <sup>2</sup>Department of Plant Sciences, University of Cambridge, Cambridge CB2 3EA, UK

11 <sup>3</sup>Scottish Association for Marine Science, Oban, PA37 1QA, UK

12 <sup>4</sup>Department of Chemistry, University of Cambridge, Cambridge CB2 1TN, UK

13 <sup>5</sup>Department of Nanoengineering, University of California San Diego, La Jolla, California 92093-  
14 0205, USA

15

16 \*shared first author

17 #correspondance: [dwangpraseurt@eng.ucsd.edu](mailto:dwangpraseurt@eng.ucsd.edu) (D. Wangpraseurt)

18

19

20

21

22 **Abstract:** Photosynthetic microalgae are an attractive source of food, fuel or nutraceuticals, but  
23 commercial production of microalgae is limited by low spatial efficiency. In the present study, we  
24 developed a simple photosynthetic hydrogel system that cultivates the green microalga,  
25 *Marinichlorella kaistiae* KAS603, together with a novel strain of the bacteria *Erythrobacter* sp..  
26 We tested the performance of the co-culture in the hydrogel using a combination of chlorophyll-*a*  
27 fluorimetry, microsensing and bio-optical measurements. Our results showed that growth rates in  
28 algal-bacterial hydrogels were about 3-fold enhanced compared to hydrogels with algae alone.  
29 Chlorophyll-*a* fluorimetry based light curves found that electron transport rates were enhanced  
30 about 20% for algal-bacterial hydrogels compared to algal hydrogels for intermediate irradiance  
31 levels. We also show that the living hydrogel is stable under different environmental conditions  
32 and when exposed to natural seawater. Our study provides a potential bio-inspired solution for  
33 problems that limit the space-efficient cultivation of microalgae for biotechnological applications.

34

## 35 **1. Introduction**

36 Microscopic photosynthesizing algae produce a range of high value products including lipids and  
37 pigments (Borrowitzka 2013). Additionally, algal biomass is of great interest for use as feedstocks  
38 in aquaculture and for the generation of biofuels (Villarruel-Lopez et al. 2017, Khan et al. 2018).  
39 However, commercial large-scale production of microalgae is still limited by low spatial efficiency  
40 and associated high production and processing costs (e.g. Borrowitzka and Vonhak 2017). Algal  
41 cultivation techniques can generally be divided into open pond systems, closed photobioreactors  
42 and biofilm-based systems (Posten 2009). Open pond systems cultivate algae in raceway ponds  
43 and have low maintenance cost but generate only limited biomass per area (Tan et al. 2020).  
44 Photobioreactor systems allow for controlled conditions of irradiance, gas flux and temperature,

45 and yield higher algal growth efficiencies, but have high operation and maintenance costs (Tan et  
46 al. 2020; Lee 2001). Biofilm-based systems cultivate algae as surface-attached biofilms rather than  
47 in liquid suspensions. Algal biofilm cultivation can lead to reduced operation costs due to limited  
48 water and energy use, as well as improved algal harvesting efficiencies (Ozkan et al. 2012; Berner  
49 et al. 2015). Biofilm systems also demonstrate greater CO<sub>2</sub> utilization efficiency, and reduced  
50 harvesting cost (Blanken et al. 2016; Roostaei et al. 2018). These systems, however, are also  
51 constrained, often relying on sophisticated artificial architectures to compete with the efficiency  
52 of natural systems and are much harder to scale-up.

53 More recently, algae have also been cultivated while immobilized in hydrogels (Berner et  
54 al. 2015). Hydrogel immobilization enables reduced water usage during algal cultivation and  
55 provides a potential physical barrier against bacterial infections (Brenner et al. 2008; Covarrubias  
56 et al. 2012; He et al. 2016). 3D bioprinting has been used to create different hydrogel structures  
57 growing a range of microalgal strains (Krujatz et al. 2014; Lode et al. 2015; Wangpraseurt et al.  
58 2020). To optimize light propagation in hydrogels with high microalgal densities, coral-inspired  
59 biomaterials have recently been developed (Wangpraseurt et al. 2020). However, the cultivation  
60 of microalgae in hydrogel-based systems, still requires further development regarding the  
61 exchange of gases and metabolites that are essential for microalgal growth (Podola et al. 2017).

62 To overcome diffusion limitation in attached cultivation systems, previous efforts have  
63 included the development of porous substrate-based bioreactors that make use of a porous  
64 membrane to deliver nutrients and promote gas exchange, whilst the surface of the biofilm is in  
65 direct contact with the ambient gas phase (Podola et al. 2017). In nature, benthic photosynthetic  
66 animals have faced similar challenges and photosynthesis in thick coral tissues could theoretically  
67 become limited by the diffusion-limited provision of HCO<sub>3</sub><sup>-</sup> from the ambient water phase.

68 However, it has been shown that coral animal and bacterial respiration promote photosynthesis of  
69 their symbiotic microalgae, suggesting that the coral host provides essential metabolites and  
70 nutrients locally to the microalgae (e.g. Kuhl et al. 1996; Schrameyer et al. 2014).

71 In corals, the microbial community performs critical functions for the coral holobiont  
72 including pathogen protection, sulfur and nitrogen cycling as well as beneficial modulations of the  
73 host microhabitat (Rosenberg et al. 2009; Krediet et al. 2013; Ceh et al. 2013). Benefits of bacterial  
74 communities for an algal host have been documented in free-living algae as well (e.g. Kazamia et  
75 al. 2012). Some bacteria can provide a local supply of essential nutrient compounds required by  
76 the algae, including nitrogen, inorganic carbon, vitamin B12 (cobalamin), and growth promoting  
77 hormones (Kouzuma and Watanabe 2015). For example, one study estimated that 50% of algal  
78 species are cobalamin auxotrophs, implying a reliance on bacterial-produced cobalamin (Croft et  
79 al. 2005). More generally, symbiotic relationships between microalgae and bacteria often employ  
80 a mutually beneficial exchange of carbon and nitrogen (Thompson et al. 2012). Experiments  
81 working with the microalgae *Chlorella* in co-culture with a known growth promoting bacteria in  
82 alginate beads demonstrates enhanced growth which can be utilized for biotechnological  
83 applications (Gonzalez and Bashan 2000). Accordingly, there is a growing interest in using  
84 microbial consortia for enhanced biomanufacturing (Padmaperuma et al. 2018; Nai and Meyer  
85 2018).

86 Here, we developed a novel gelatin-based hydrogel system by combining microalgae and  
87 bacteria for space-efficient microalgal cultivation. We chose the green microalga *Marinichlorella*  
88 *kaistiae* KAS603 and screened 14 marine bacterial strains for beneficial effects on algal biomass.  
89 Based on these results, we further measured the bio-optical properties and photosynthetic  
90 performance of a synthetic co-culture between *Marinichlorella kaistiae* KAS603 and a novel strain

91 of *Erythrobacter* sp.. We then evaluated the beneficial effects of the *Erythrobacter* strain on a  
92 range of microalgae covering coccolithophorids, red algae and other species of green microalgae.  
93 Finally, the mechanical stability of our hydrogel system was tested under different environmental  
94 conditions.

95

## 96 **2. Methods**

### 97 **Experimental approach**

98 To test for beneficial effects of algal-bacterial co-culture, we assessed a range of bacterial and algal  
99 strains. *Marinichlorella kaistiae* KAS603 (Sánchez-Alvarez et al. 2017) was used as model algal  
100 strain. *M. kaistiae* KAS603 is a robust algal strain that is morphologically similar to *Chlorella* and  
101 has high lipid and biomass production rates (Sánchez-Alvarez et al. 2017). *M. kaistiae* KAS603  
102 has been successfully grown in 3D bioprinted gelatin-based hydrogels (Wangpraseurt et al. 2020).  
103 The beneficial impact of 14 different bacterial strains (see Table S1) on *M. kaistiae* KAS603  
104 growth was investigated over 3-day co-culture experiments. These preliminary experiments  
105 suggested enhanced growth with the strain SIO\_La6, closely related to *Erythrobacter* sp., (Table  
106 S1), which was then used as our bacterial model for co-culture experiments. Finally, to test whether  
107 these beneficial effects of SIO\_La6 were transferrable to other microalgal species, co-cultures  
108 between SIO\_La6 and *Micromonas* sp., *Porphyridium cruentum*, *Pleurochrysis carterae*, and  
109 *Amphidinium carterae*, were also investigated. Co-culture experiments with *M. Kaistiae* KAS603  
110 were conducted also in liquid culture to assess the relative effect of algae immobilization in  
111 hydrogels (Fig. S1).

### 112 **Stock cultures**

113 Bacterial stock cultures were cultivated in Zobell broth at 25°C under sterile conditions. Bacterial  
114 cultures used for hydrogel immobilization were harvested during exponential growth in Zobell  
115 broth as determined via optical density (OD) measurements (Begot et al. 1996) and flow cytometry  
116 (Gasol and Del Giorgio 2000). Bacterial cultures were identified by 16S rDNA Sanger sequencing  
117 (using the primer pair 27F-1492R) to determine their closest phylogenetic relations (Table S1).  
118 Algal stock cultures were grown in artificial seawater medium (ASW, Darley and Volcani 1969)  
119 at 25 °C under a continuous irradiance regime of 150  $\mu\text{mol photons m}^{-2} \text{ s}^{-1}$  provided by white LED  
120 light panels (AL-H36DS, Ray2, Finnex). Microalgae were harvested from liquid stock cultures in  
121 the exponential growth phase for hydrogel immobilization. Cell density was measured using a  
122 hemocytometer, with 3 technical replicate counts per algal stock sample.

### 123 **Algal-bacterial hydrogel fabrication and cultivation**

124 Hydrogels were made by using a 10% solution of porcine gelatin (type-A, Sigma-Aldrich, USA)  
125 in ASW. The solution was prepared by heating the gelatin-ASW mixture on a hot plate under  
126 continuous stirring to 90 °C until it was optically clear. The solution was cooled to 30 °C and 2.5  
127 mL of the gel solution was rapidly mixed with 2 mL of the algal stock solution (at a concentration  
128 of  $1.36 \times 10^7$  cells/mL for main *M. kaistiae* experiments) and 0.5 mL of either sterile Zobell  
129 medium (for monoculture control gels) or Zobell medium containing a chosen bacterial strain (for  
130 co-culture gels) (Figure 1). Bacterial density for cultivation experiments was chosen at an  $\text{OD}_{600}$   
131 of 0.02. We also performed preliminary growth experiments using different starting concentrations  
132 of microalgal cell density (Fig. S2). The solution was vortexed for 30 s, to ensure proper mixing  
133 of algae and bacteria, before it was poured into Petri dishes. Gelation was facilitated by keeping  
134 the Petri dishes at 18 °C for 1 hour, which resulted in gels that were ~10 mm thick. Gels were then

135 cultivated at 25 °C under a continuous irradiance regime of 150  $\mu\text{mol photons m}^{-2} \text{s}^{-1}$  provided by  
136 white LED light panels (AL-H36DS, Ray2, Finnex).

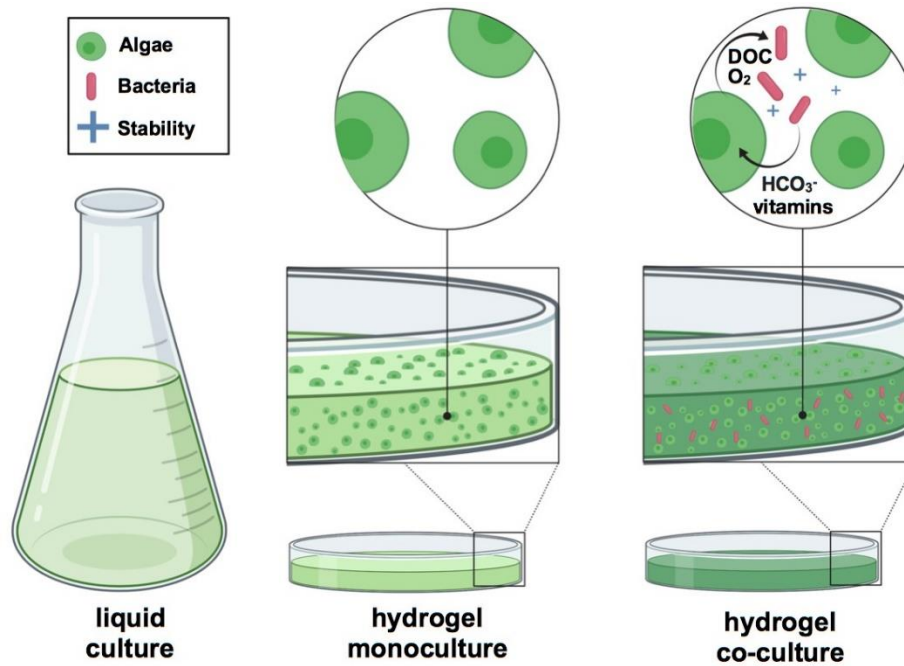

138 **Fig. 1** Development of a synthetic co-culture between microalgae and *Erythrobacter sp.* in a  
139 gelatin-based hydrogel. Algae were grown in monoculture and in co-culture with *Erythrobacter*  
140 *sp.* both in liquid culture and in hydrogel configuration. Arrows indicate potential interactions  
141 between algae and bacteria that were hypothesized to enhance algal growth. Microalgal  
142 photosynthesis generates  $\text{O}_2$  and dissolved organic carbon (DOC) that fuels bacterial metabolism.  
143 In turn, bacterial activity provides an inorganic carbon source for photosynthesis and vitamins.  
144 This synthetic co-culture enhances the stability of the biopolymer when exposed to potential  
145 pathogens. (Figure was created with BioRender.com)

146

### 147 **Performance testing**

148 *Microalgal cell density.* Hydrogels were liquified by heating to 30°C on a hot plate. The liquid  
149 algal suspension was then diluted with ASW and the cell density was determined with a

150 hemocytometer (see above). The accuracy of this approach was tested using stock cultures of  
151 known cell density, showing an error of less than 3% between expected and measured cell  
152 densities.

153 *O<sub>2</sub> microsensor measurements.* Clark-type O<sub>2</sub> microsensors (tip size of 25 μm, a 90% response  
154 time of <0.5 s and a stirring sensitivity of ~1%; Unisense A/S, Aarhus, Denmark) were used to  
155 measure O<sub>2</sub> production and consumption of the hydrogels as described previously (Wangpraseurt  
156 et al. 2012). Briefly, microsensors were connected to a picoammeter (Unisense, Denmark) and  
157 operated by an automatic microsensor profiler (MU1, Pyroscience GmbH, Germany). Hydrogels  
158 were placed in a black acrylic flow chamber and flowing seawater was supplied at a flow velocity  
159 of 0.5 cm s<sup>-1</sup> at 25° C and a salinity of 35. Microsensors were positioned at the surface of the  
160 hydrogel by observing the microsensor tip with the aid of a dissecting microscope and the use of  
161 an automated micromanipulator (MU1, Pyroscience GmbH, Germany). Steady-state  
162 O<sub>2</sub> concentration profiles from the hydrogel surface through the diffusive boundary layer (DBL)  
163 and into the mixed turbulent water phase above were performed in 100 μm steps under an incident  
164 photon irradiance of E<sub>d</sub>(PAR) = 0 and 550 μmol photons m<sup>-2</sup> s<sup>-1</sup>. O<sub>2</sub> microsensors were linearly  
165 calibrated from readings at 100 % air saturated seawater at experimental temperature and using  
166 anoxic water (flushed with N<sub>2</sub>). Percent air saturation in seawater at experimental temperature and  
167 salinity was transformed to O<sub>2</sub> concentration (μmol O<sub>2</sub> L<sup>-1</sup>) using gas tables (Ramsing and  
168 Gundersen 2011).

169

170 *Variable chlorophyll a fluorimetry.* We used a variable chlorophyll a fluorometer (diving PAM II,  
171 Walz, Germany) to characterize PS II performance (Baker 2008). The fiber of the PAM system  
172 was mounted on a laboratory stand and directed vertically towards the surface of the hydrogels at



173 a fixed distance of 1 cm. Hydrogels were dark adapted for at least 30 minutes before experimental  
174 measurements. Rapid light curves (RLC) (Ralph and Gademan 2005) were performed over a range  
175 of 8 irradiance intensities spanning 0-1500  $\mu\text{mol photons m}^{-2} \text{ s}^{-1}$  of incident downwelling  
176 irradiance. For each RLC, the dark-adapted hydrogels were incubated at each experimental  
177 irradiance regimes for 15 seconds followed by a saturation pulse. The variable chlorophyll  
178 fluorescence data was analyzed as described previously (Ralph and Gademan 2005). Briefly, the  
179 maximum quantum yield of PSII was calculated as:

$$180 \quad F_v/F_m = [F_m - F_0] / F_m$$

181 and the effective quantum yield of PSII was calculated as:

$$182 \quad \Phi_{PSII} = \Delta F / F_m' = [F_m' - F] / F_m'$$

183 Where  $F_0$  and  $F$  describe the minimum and transient fluorescence and  $F_m$   $F_m'$  describe the  
184 maximum fluorescence in the light adapted state. The electron transport rate was calculated as  
185  $\text{ETR} = \Phi_{PSII} \times E_d \times 0.5 \times \text{AF}$ , where  $E_d$  is the incident downwelling irradiance (400–700 nm), 0.5  
186 assumes the equal distribution between PSI and PSII and AF denotes the absorption factor which  
187 was assumed to be 0.83 (Ralph and Gademan 2005). It is important to note that AF will vary as a  
188 function of pigment and cell density and thus serves only as an approximation (Wangpraseurt et  
189 al. 2019). The photosynthetic light curves were fitted to the empirical equations of Platt and  
190 Gallegos (1980), using a Marquardt-Levenberg regression algorithm:

$$191 \quad P = P_s (1 - \exp^{-\alpha E_d / P_s}) \exp^{-\beta E_d / P_s}$$

192 where  $P_s$  is a scaling factor defined as the maximum potential rETR,  $\alpha$  describes the light use  
193 efficiency, i.e. the initial slope of the RLC and  $\beta$  characterizes photoinhibition and indicates the  
194 slope of the RLC where PSII declines. The maximum electron transport rate  $\text{ETR}_{\text{max}}$  and the  
195 light intensity at half saturation,  $E_k$  were calculated as:

196 
$$ETR_{max} = PS(\alpha/[\alpha + \beta])(\beta/[\alpha + \beta])^{\beta/\alpha}$$

197

198 
$$E_k = ETR_{max}/\alpha$$

199 The fitting procedure was sensitive to initial guesses of PS,  $\alpha$ ,  $\beta$ , which were adjusted for each  
200 curve fitting. All fitting was done with custom codes written in Matlab 2018b.

201

202 *Bio-optical properties of the hydrogels.* Irradiance reflectance of the gels were measured with a  
203 0.7 mm wide flat-cut fiber-optic reflectance probe (Ocean Optics, USA) with the hydrogels  
204 positioned in the black acrylic flow-through system described previously. The hydrogel was  
205 illuminated vertically incident by a light source emitting broadband white light. Reflectivity was  
206 determined with the reflectance probe positioned at a distance of 500  $\mu\text{m}$  from the hydrogel  
207 surface. All reflectivity measurements were normalized to the reflectivity of a 10%, 20% and 99%  
208 white diffusing reflectance standard (Spectralon, Labsphere, USA). These measurements occurred  
209 under identical configuration and distance to light source as on the hydrogel surface, but were  
210 performed in air. Measurements of scalar irradiance (i.e. the integral quantum flux from all  
211 directions around a given point) were measured with fiber-optic microsensors (zensor, Denmark)  
212 as described previously (Wangpraseurt et al. 2012).

### 213 **Bacterial contamination experiment**

214 To test whether the co-culture with *Erythrobacter* sp. SIO\_La6 strain would provide protection  
215 from other microbes, we exposed the hydrogels to natural unsterilized seawater supplied from the  
216 Scripps Pier. For these tests, 3-day old hydrogels were incubated with the natural seawater for 1.5  
217 hours in a beaker under low turbulent flow. The gels were then removed, and cultivation in the  
218 environmental growth room continued as described above. The gels were visually examined at

219 every day after exposure and photographed to assess visual differences, such as noticeable cell  
220 death, bacterial growth or hydrogel liquification, indicative of gelatin-degrading bacteria.

## 221 Results and Discussion

222 Here, we developed a simple hydrogel system for the space-efficient co-culture of microalgae. We  
223 found that a novel strain of *Erythrobacter* sp. (SIO\_La6, Fig. 2) isolated from Southern California  
224 coastal waters (off Scripps Pier) has beneficial effects on growth and photosynthetic performance  
225 of microalgae immobilized in hydrogels.

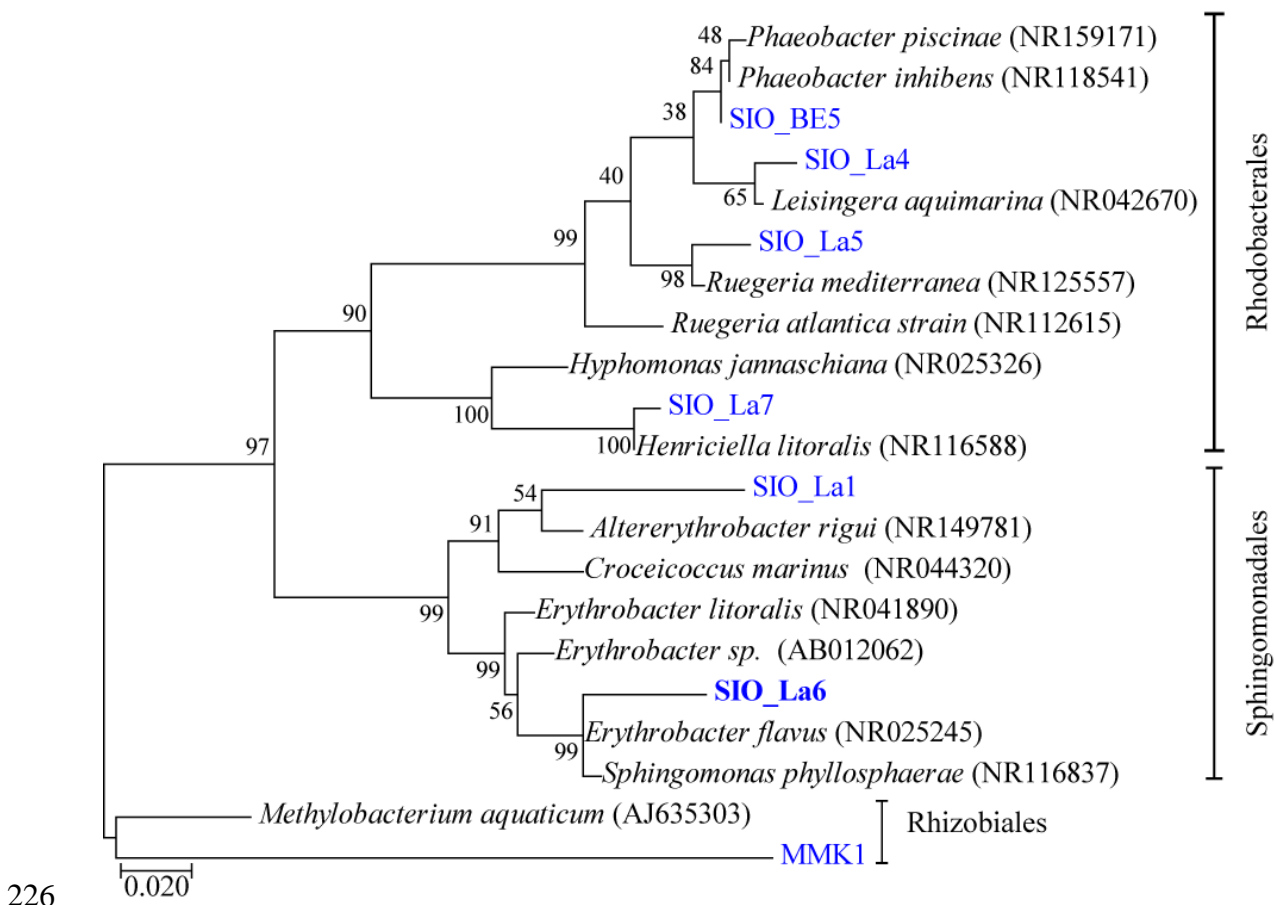

227 **Fig. 2** Maximum likelihood tree of Alpha-proteobacteria sequences closely related to the tested  
228 isolates (SIO\_La6). Reference sequences from NCBI are indicated in italic. Bootstrap values  
229 (n=1000) are indicated at nodes; scale bar represents changes per position.

230 *Cell density differences between treatments*

231 Microalgal cell density was on average 2.3-fold enhanced for *Marinichlorella kaistiae* KAS603  
232 gels co-cultured with SIO\_La6 (mean =  $2.85 \times 10^7$  cells mL<sup>-1</sup>, SD =  $5.94 \times 10^6$ ,  $n = 5$ ) compared  
233 to monoculture gels ( $1.18 \times 10^7$  cells mL<sup>-1</sup>, SD =  $4.06 \times 10^6$ ,  $n = 5$ ) after 72 h of cultivation (paired  
234 t-test,  $p < 0.001$ , Fig. 3A). The cell doubling time was 16.75 h for co-cultures compared to 33.11 h  
235 for monocultures (Fig. 3). The beneficial effects of co-culture with *Erythrobacter sp.* SIO\_La6  
236 were also evident in liquid culture, although the relative growth stimulating effect was 15% higher  
237 in hydrogel (Supplementary Fig. 2). In a stagnant hydrogel, gas exchange is likely to become a  
238 limiting growth factor, while such limitation is unlikely to occur in a liquid mixed culture. Thus,  
239 the relative enhancement for hydrogel cultures could suggest that bacterial colonies stimulate gas  
240 exchange, and provide nutrients locally within the hydrogel. Indeed, bacteria observed during  
241 confocal microscopy were observed forming aggregates around algal cells (Supplementary Fig.  
242 3). This proximity, and reduced diffusion in a gel compared to liquid culture, may account for  
243 better access of algae to growth enhancing nutrients from bacteria in co-cultured hydrogels.

244 Following the successful tests with *M. kaistiae* KAS603, other common microalgae were  
245 tested in co-culture with SIO\_La6. The bacterial co-culture enhanced microalgal growth for three  
246 of the five microalgal strains compared to monoculture controls (Fig. 3B). Cell densities after 3-d  
247 of cultivation were at least 2-fold higher for the coccolithophorid algae *Pleurochrysis carterae* and  
248 the red algae *Porphyridium cruentum* when grown in co-culture hydrogels (Fig. 3B). Interestingly,  
249 cultures that did not perform well in co-culture (e.g. *Micromonas sp.* and *Amphidinium carterae* )  
250 also showed limited growth when encapsulated in the gelatin-based hydrogel in monoculture,  
251 suggesting that hydrogel immobilization interfered with the growth dynamics of these algae (Fig.

252 3B). This suggests that *Micromonas sp.* and *Amphidinium carterae* might not be suitable  
253 candidates for biotechnological applications using hydrogel immobilization.

254

255

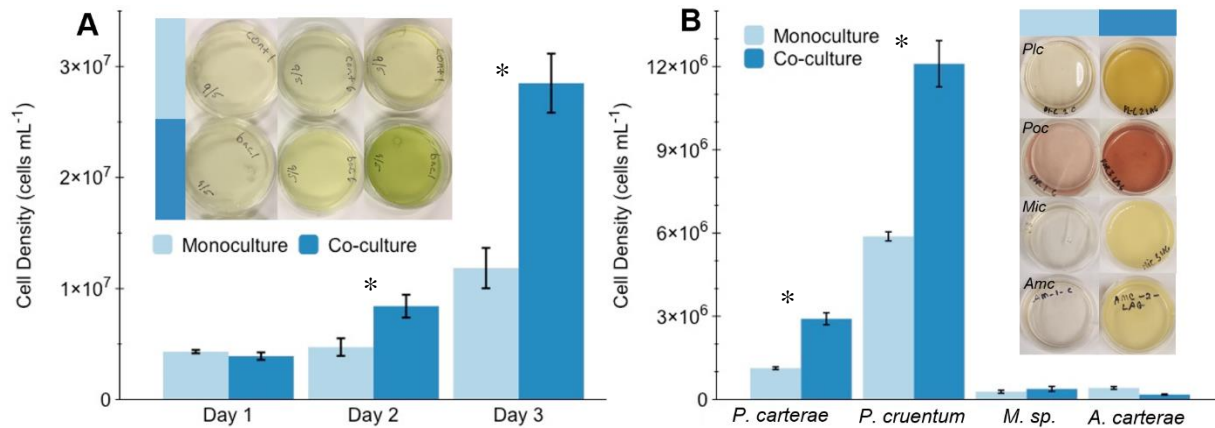

256

257 **Fig. 3** Effect of algal-bacterial hydrogel co-culture on microalgal cell density growth. (A) 3-d  
258 growth dynamics of *Marinichlorella kaistiae* KAS603 in monoculture (light blue) and in co-  
259 culture with *Erythrobacter sp.* SIO\_La6 (dark blue). Insets show example top view images of  
260 hydrogels each day. Data are means  $\pm$ SD,  $n = 15$ . (B) Cell density of *Pleurochrysis carterae*,  
261 *Porphyridium cruentum*, *Micromonas sp.* and *Amphidinium carterae* after 3 days of growth in  
262 monoculture and co-culture. Images show top view images of hydrogel after 3 days. Data are  
263 means  $\pm$  SD  $n=2$ . \* indicates a significant difference between treatments ( $p<0.05$ , paired student's  
264 t-test).

265

### 266 Co-culture effects on microalgal photosynthesis and bio-optics

267 Compared to *Marinichlorella kaistiae* KAS603 monocultures, O<sub>2</sub> microsensor  
268 measurements in co-cultures indicated 4.9-fold enhancements of net photosynthesis at high light  
269 (550  $\mu\text{mol photons m}^{-2} \text{s}^{-1}$ ) irradiance regimes (Fig. 4A). Additionally, co-cultures exhibited about  
270 4.3-fold greater rates of dark respiration (Fig. 4A). Variable chlorophyll-*a* fluorimetry  
271 measurements showed significant enhancements in the maximum quantum yield of PSII ( $F_v/F_m$ )

272 for co-culture hydrogels compared to monoculture hydrogels during 7 days of growth (mean =  
273 0.603, SD = 0.022 vs mean = 0.535, SD = 0.004, respectively; Fig. 4B, paired t-test  $p = 0.006$ ).  
274  $F_v/F_m$  is a key parameter used to assess the healthiness of photosynthesizing microalgae (e.g. Baker  
275 2008) and thus suggests that algae in co-culture displayed superior photosynthetic capacities.  
276 Likewise, relative electron transport rates showed clear differences in key photosynthetic  
277 parameters including  $\alpha$  and  $ETR_{max}$  (Fig. 4D-F, Table 1). For instance, at day 3  $ETR_{max}$  was about  
278 71.6% higher for cocultures vs monocultures Fig. 4D-F, Table 1).

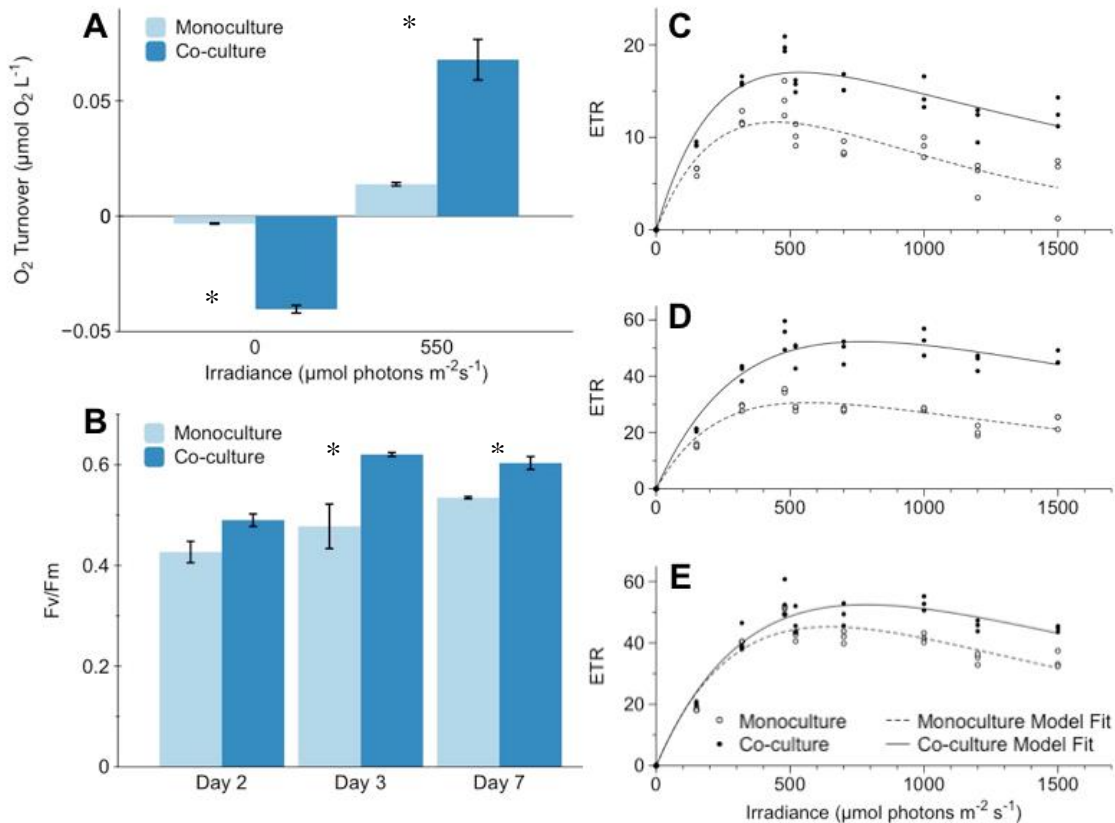

279

280 **Fig. 4** Photosynthetic performance of hydrogels in mono- and co-culture. (A), O<sub>2</sub> turnover based  
281 on O<sub>2</sub> microsensor measurements of the linear O<sub>2</sub> flux from the surface into the diffusive boundary  
282 layer performed at 0 (dark respiration) and at 550 μmol photons m<sup>-2</sup> s<sup>-1</sup> (net photosynthesis). (B)  
283 Maximum quantum yield of PSII ( $F_v/F_m$ ) and electron transport rates (ETR) at (C) day 2, (D) day

284 3, and (E) day 7 of algal cultivation. Data are means  $\pm$  SD ( $n = 4$  for panel A and  $n = 3$  for panel  
285 B-E). Note that y-axis scale was adjusted for clarity in panel C-E. \* indicates a significant  
286 difference between treatments ( $p < 0.05$ , paired student's t-test).

287

288         Although areal net photosynthetic ( $P_n$ ) rates were strongly enhanced in co-culture, these  
289 differences were also affected by the greater algal growth in co-culture (Fig. 3). However,  
290 normalizing  $P_n$  rates to the differences in biomass still suggests an approximate doubling in net  
291 photosynthesis in co-culture vs monoculture (compare Fig. 3A and 4A). As *Erythrobacter sp.* are  
292 anoxygenic phototrophic bacteria and thus does not produce  $O_2$  (Koblizek et al. 2003) such  
293 differences strongly suggest cell specific enhancements of photosynthetic activity by *M. kaistiae*  
294 KAS603 in the presence of *Erythrobacter*. It is important to note that these measurements include  
295 respiratory activity by the bacteria, further strengthening the argument of enhanced algal  
296 photosynthesis in co-culture. PAM measurements can detect potential electron transport by  
297 *Erythrobacter sp.* (Chandaravithoon et al. 2020), however we did not find any measurable  
298 quantum yield of PSII from SIO\_LA6 in monoculture ( $F_v/F_m = 0$ , data not shown). Additionally,  
299 diffuse reflectance measurements did not show characteristic absorption peaks of  
300 bacteriochlorophyll *a* at  $\sim 750$  nm (Fig. 5, Yurkov and Beatty 1998), suggesting that pigment  
301 synthesis and photosynthetic electron transport might be low by this *Erythrobacter* strain. In turn,  
302 reflectance in the near-infrared region ( $\sim 750$  nm) was about 2.5-fold enhanced which could be  
303 indicative of the production of light scattering microbial extracellular polymeric substances (EPS,  
304 Flemming and Wingender 2001). Such EPS has previously been shown to scatter light and could  
305 potentially enhance the internal actinic irradiance intensity which would further promote  
306 photosynthesis (Decho et al. 2003; Fisher et al. 2019). Clearly, there are various potential  
307 mechanisms underlying the enhanced photosynthetic performance of the co-culture hydrogels and

308 a detailed understanding of the mechanisms was beyond the scope of this first study. However,  
309 taken together our results indicate that *Erythrobacter* sp. SIO\_La6 enhances *Marinichlorella*  
310 *kaistiae* KAS603 photosynthesis (Table 1) which could explain the enhanced algal biomass in co-  
311 culture.

312

313

314 **Table 1** Photosynthetic performance of *Marinichlorella kaistiae* KAS603 grown in the hydrogel  
315 alone (mono-culture) or together with *Erythrobacter* sp. SIO\_La6 (co-culture). Parameters are  
316 derived from the best fit from all replicate measurements ( $n=3$ , lines in Fig. 4 C-E)

|             | Day 2        |            | Day3         |            | Day7         |            |
|-------------|--------------|------------|--------------|------------|--------------|------------|
|             | Mono-culture | co-culture | Mono-culture | co-culture | Mono-culture | co-culture |
| $\alpha$    | 0.07         | 0.10       | 0.17         | 0.21       | 0.21         | 0.20       |
| $\beta$     | 0.04         | 0.015      | 0.03         | 0.034      | 0.06         | 0.05       |
| $ETR_{max}$ | 11.64        | 17.03      | 30.59        | 52.30      | 45.26        | 52.5       |
| $E_k$       | 158          | 169        | 180          | 245        | 220          | 261        |
| $R^2$       | 0.8          | 0.90       | 0.91         | 0.93       | 0.93         | 0.94       |

317

318



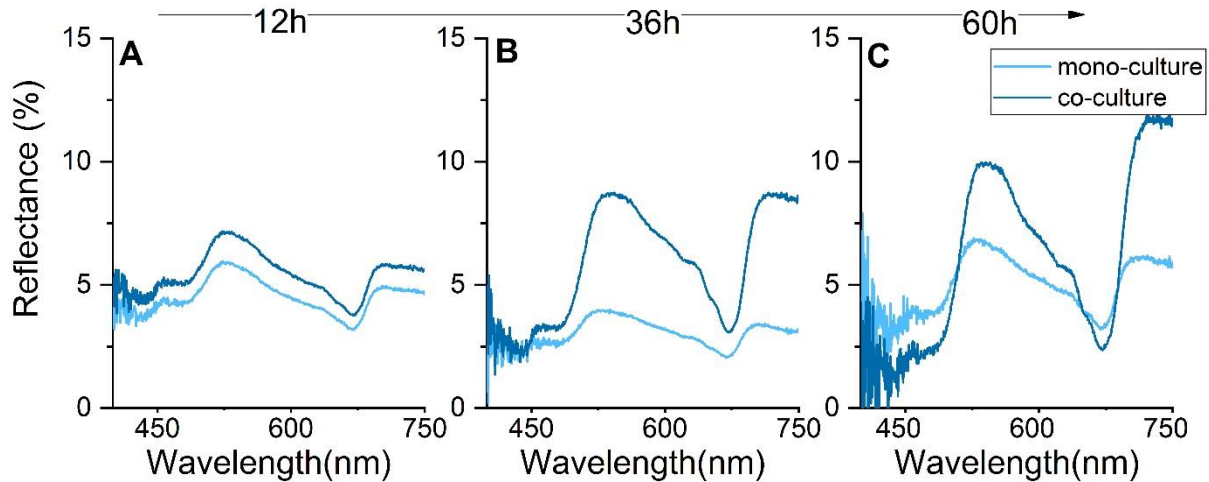

320 **Fig. 5** Hydrogel diffuse reflectance (%) after (A) day 1, (B) day 2, and (C) day 3 of algal  
321 cultivation. Data are means from 3 hydrogels, error bars are omitted for clarity (SD was less than  
322 5%)

323

#### 324 *Contamination resistance in hydrogels*

325

326

327

328

329

330

331

332

333

334

335

336

A potential key problem in cultivating microalgae in hydrogels is that most biopolymers are readily degraded by various bacterial communities (Pathak et al. 2017). We hypothesized that co-cultivation might provide protection from such degradation by occupying microbial habitats within the hydrogel and potentially producing antibiotics. Such concept is analogous to the role of the microbial community in the coral mucus, which protects from opportunistic microbes (Shnit-Orland et al. 2009). Following exposure to natural seawater, co-culture gels remained viable and no visible degradation of the gelatin matrix was noticeable even after 7 days of cultivation (Fig. 6A-E). However, monocultures showed clear degradation and liquefaction of the polymer matrix within 24 hours (Fig. 6A-E). Likewise, previous experiments using *Chlorella*-bacteria co-cultures in alginate beads found reduced contamination by foreign bacteria from the environment and concluded that co-cultured bacteria provide a physical barrier (Covarrubias et al. 2012). Here, it is likely that DOC produced by the algae might enhance virulence factors (present in SIO\_La6

337 genomes, J. Dinasquet pers. com.) and toxin production as observed in other *Erythroacter* species  
338 in the presence of algal DOC (Cardenas et al. 2018). This induced pathogenicity might have  
339 antagonistic effects against environmental contaminants. Although the mechanisms warrant  
340 further investigation, these initial results suggest protective effects of our synthetic co-culture  
341 hydrogel from external microbes. This could be further developed as a viable bio-inspired  
342 alternative to costly antibiotic treatments that are currently used in such cultivation approaches  
343 (Berner et al. 2015).

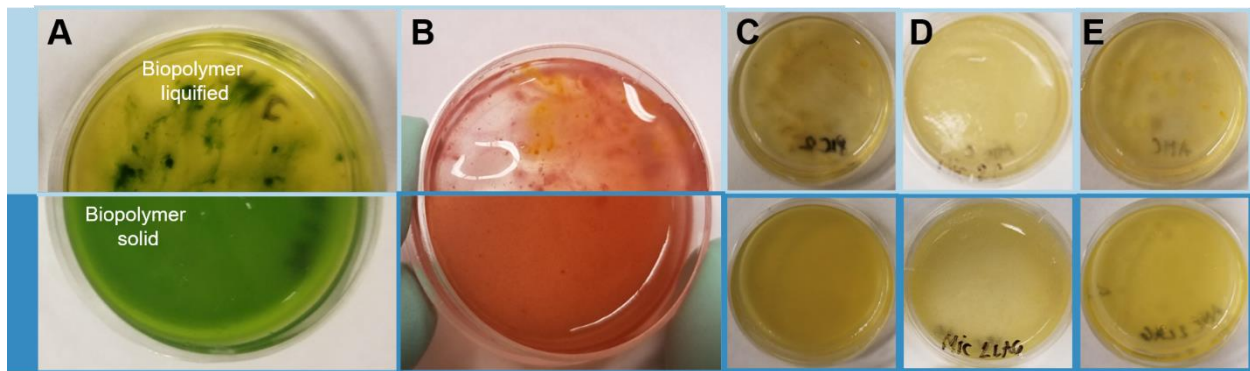

345 **Fig. 6** Biopolymer stability after exposure to natural seawater. Images show top view of hydrogels  
346 after 7 days of the seawater exposure experiment. Monocultures (top panels, light blue) are  
347 liquified while co-cultures remain solid (bottom panels, dark blue) for (A) *Marinichlorella kaistiae*  
348 KAS603 (B) *Porphyridium cruentum*, (C) *Pleurochrysis carterae*., (D) *Micromonas sp.* and (E)  
349 *Amphidinium carterae*

350

## 351 Conclusions

352 This study developed a simple hydrogel system for microalgal cultivation in co-culture with a  
353 novel strain of *Erythroacter* sp. Our findings demonstrate enhanced photosynthetic activity and  
354 growth rates of microalgae in co-culture when immobilized in our hydrogel system. We further

355 show that our gelatin-based hydrogel is easy to fabricate, requires low maintenance, and remains  
356 stable when the co-culture is exposed to natural contaminants. Our study suggests that co-  
357 cultivation in hydrogels of microalgae with *Erythrobacter sp.*, enhances microalgal growth and  
358 density, and could potentially reduce the need for costly antibiotics. We conclude that hydrogel  
359 algal-bacterial co-culture is a simple, bio-inspired approach that can be further developed to solve  
360 some problems that currently limit microalgal cultivation.

361

362 **Data availability:** All raw data generated during this study are deposited on figshare (link: XX).

363

364 **Author contributions:**

365 Conceptualized and designed the study: D.W., J.D., N.M., T.B., S.V., A.G.S., M.D., Performed  
366 experimental measurements: N.M., T.B., A.S., A.D. Analyzed and interpreted data: N.M., T.B.  
367 D.W. Provided reagents, materials and analysis tools: D.W., J.D., D.D.D., S.V., F.A., J.E.S.,  
368 Supervised the study: D.W., S.V., D.D.D. Wrote the manuscript: N.M, T.B., DW. All authors  
369 critically assessed the results and edited drafts of the manuscript.

370 **Acknowledgements:**

371 Mark Hildebrand is thanked for initial input on the experimental approach and for providing  
372 *Marinichlorella* cultures. Orna Cook is thanked for providing algal cultures. Funding: This study  
373 was funded by the European Union's Horizon 2020 research and innovation programme  
374 (702911-BioMIC-FUEL, D.W., D.D.D., S.V.), the European Research Council (ERC-2014-STG

375 H2020 639088, S.V.), the European Union's 7<sup>th</sup> Framework programme (PIOF-GA-2013-  
376 629378, J.D.), the Gordon and Betty Moore Foundation (Grant GBMF4827,F.A.).

377

378 **References:**

379 Baker NR (2008) Chlorophyll Fluorescence: A Probe of Photosynthesis In Vivo. *Annu Rev Plant*  
380 *Biol* 59:89–113. <https://doi.org/10.1146/annurev.arplant.59.032607.09275>

381 Begot C, Desnier I, Daudin JD, et al (1996) Recommendations for calculating growth parameters  
382 by optical density measurements. *J Microbiol Method* 25:225–232.

383 [https://doi.org/10.1016/0167-7012\(95\)00090-9](https://doi.org/10.1016/0167-7012(95)00090-9)

384 Berner F, Heimann K, Sheehan M (2015) Microalgal biofilms for biomass production. *J Appl*  
385 *Phycol* 27:1793–1804. <https://doi.org/10.1007/s10811-014-0489-x>

386 Blanken W, Schaap S, Theobald S, et al (2017) Optimizing carbon dioxide utilization for  
387 microalgae biofilm cultivation. *Biotechnol Bioeng* 114:769–776.

388 <https://doi.org/10.1002/bit.26199>

389 Borowitzka MA (2013) High-value products from microalgae-their development and  
390 commercialisation. *J Appl Phycol* 25:743–756

391 Borowitzka MA, Vonshak A (2017) Scaling up microalgal cultures to commercial scale. *Eur J*  
392 *Phycol* 52:407–418. <https://doi.org/10.1080/09670262.2017.1365177>

393 Brenner K, You L, Arnold FH (2008) Engineering microbial consortia: a new frontier in  
394 synthetic biology. *Trends Biotechnol* 26:483–489

- 395 Cárdenas A, Neave MJ, Haroon MF, et al (2018) Excess labile carbon promotes the expression  
396 of virulence factors in coral reef bacterioplankton. *ISME J* 12:59–76.  
397 <https://doi.org/10.1038/ismej.2017.142>
- 398 Ceh J, Kilburn MR, Cliff JB, et al (2013) Nutrient cycling in early coral life stages: *Pocillopora*  
399 *damicornis* larvae provide their algal symbiont ( *Symbiodinium* ) with nitrogen acquired  
400 from bacterial associates. *Ecol Evol* 3:2393–2400. <https://doi.org/10.1002/ece3.642>
- 401 Chandaravithoon P, Ritchie RJ, Runcie JW (2020) Measuring photosynthesis of both oxygenic  
402 and anoxygenic photosynthetic organisms using pulse amplitude modulation (PAM)  
403 fluorometry in wastewater ponds. *J Appl Phycol* 32:2615–2629.  
404 <https://doi.org/10.1007/s10811-020-02171-8>
- 405 Cho K, Kang Z, Ramanan R, et al (2018) Influence of Water Depth on Microalgal Production,  
406 Biomass Harvest, and Energy Consumption in High Rate Algal Pond Using Municipal  
407 Wastewater. *Artic J Microbiol Biotechnol* 28:630–637.  
408 <https://doi.org/10.4014/jmb.1801.01014>
- 409 Covarrubias SA, De-Bashan LE, Moreno M, Bashan Y (2012) Alginate beads provide a  
410 beneficial physical barrier against native microorganisms in wastewater treated with  
411 immobilized bacteria and microalgae. *Appl Microbiol Biotechnol* 93:2669–2680.  
412 <https://doi.org/10.1007/s00253-011-3585-8>
- 413 Croft MT, Lawrence AD, Raux-Deery E, et al (2005) Algae acquire vitamin B12 through a  
414 symbiotic relationship with bacteria. *Nature* 438:90–93.  
415 <https://doi.org/10.1038/nature04056>

- 416 Darley WM, Volcani BE (1969) Role of silicon in diatom metabolism. A silicon requirement for  
417 deoxyribonucleic acid synthesis in the diatom *Cylindrotheca fusiformis* Reimann and  
418 Lewin. *Exp Cell Res* 58:334–342. [https://doi.org/10.1016/0014-4827\(69\)90514-X](https://doi.org/10.1016/0014-4827(69)90514-X)
- 419 Decho AW, Kawaguchi T, Allison MA, et al (2003) Sediment properties influencing upwelling  
420 spectral reflectance signatures: The “biofilm gel effect.” *Limnol Oceanogr* 48:431–443.  
421 [https://doi.org/10.4319/lo.2003.48.1\\_part\\_2.0431](https://doi.org/10.4319/lo.2003.48.1_part_2.0431)
- 422 Fisher A, Wangpraseurt D, Larkum AWD, et al (2018) Correlation of bio-optical properties with  
423 photosynthetic pigment and microorganism distribution in microbial mats from Hamelin  
424 Pool, Australia. *FEMS Microbiol Ecol* 95:. <https://doi.org/10.1093/femsec/fiy219>
- 425 Flemming HC, Wingender J (2001) Relevance of microbial extracellular polymeric substances  
426 (EPSs) - Part I: Structural and ecological aspects. *Water Sci Technol* 43(6):1–8
- 427 Fuentes J, Garbayo I, Cuaresma M, et al (2016) Impact of Microalgae-Bacteria Interactions on  
428 the Production of Algal Biomass and Associated Compounds. *Mar Drugs* 14:100.  
429 <https://doi.org/10.3390/md14050100>
- 430 Gasol JM, del Giorgio PA (2000) Using flow cytometry for counting natural planktonic bacteria  
431 and understanding the structure of planktonic bacterial communities. In: *Scientia Marina*.  
432 CSIC Consejo Superior de Investigaciones Cientificas 2:197–224
- 433 Gonzalez LE, Bashan Y (2000) Increased growth of the microalga *Chlorella vulgaris* when  
434 coimmobilized and cocultured in alginate beads with the plant-growth-promoting  
435 bacterium *Azospirillum brasilense*. *Appl Environ Microbiol* 66:1527–1531.  
436 <https://doi.org/10.1128/AEM.66.4.1527-1531.2000>
- 437 He P, Zeng Y, Lin Y-J, Wang Y (2016)  
438 A Review of Novel Materials and Technologies for the Sustainable Development of  
Microalgae Biofuel. *SSRN Electron J* 2758331. <https://doi.org/10.2139/ssrn.2758331>

- 439 Kazamia E, Czesnick H, Nguyen TT van, et al (2012) Mutualistic interactions between vitamin  
440 B12-dependent algae and heterotrophic bacteria exhibit regulation. *Environ Microbiol*  
441 14:1466–1476. <https://doi.org/10.1111/j.1462-2920.2012.02733.x>
- 442 Khan, M. I., Shin, J. H., & Kim, J. D. (2018). The promising future of microalgae: Current  
443 status, challenges, and optimization of a sustainable and renewable industry for biofuels,  
444 feed, and other products. *Microbial Cell Factories*, 17(1), 1–21.  
445 <https://doi.org/10.1186/s12934-018-0879-x>
- 446 Koblížek M, Bějá O, Bidigare RR, et al (2003) Isolation and characterization of *Erythrobacter*  
447 sp. strains from the upper ocean. *Archives Microbiol* 180:327–338.  
448 <https://doi.org/10.1007/s00203-003-0596-6>
- 449 Kouzuma A, Watanabe K (2015) Exploring the potential of algae/bacteria interactions. *Curr*  
450 *Opin Biotechnol* 33:125–129
- 451 Krediet CJ, Ritchie KB, Paul VJ, Teplitski M (2013) Coral-associated micro-organisms and their  
452 roles in promoting coral health and thwarting diseases. *Proc R Soc B: Biol Sci* 280
- 453 Krujatz F, Lode A, Brüggemeier S, et al (2015) Green bioprinting: Viability and growth analysis  
454 of microalgae immobilized in 3D-plotted hydrogels versus suspension cultures. *Eng Life*  
455 *Sci* 15:678–688. <https://doi.org/10.1002/elsc.201400131>
- 456 Köhl M, Glud RN, Ploug H, Ramsing NB (1996) Microenvironmental control of photosynthesis  
457 and photosynthesis-coupled respiration in an epilithic cyanobacterial biofilm. *J Phycol*  
458 32:799–812. <https://doi.org/10.1111/j.0022-3646.1996.00799.x>
- 459 Lee YK (2001) Microalgal mass culture systems and methods: Their limitation and potential. In:  
460 *J Appl Phycol*. pp 307–315

- 461 Lode A, Krujatz F, Brüggemeier S, et al (2015) Green bioprinting: Fabrication of photosynthetic  
462 algae-laden hydrogel scaffolds for biotechnological and medical applications. *Eng Life Sci*  
463 15:177–183. <https://doi.org/10.1002/elsc.201400205>
- 464 Meyer V, Nai C From axenic to mixed cultures : technological advances accelerating a paradigm  
465 shift in microbiology. *Trends Microbiol* 26(6):538-54.  
466 <https://doi.org/10.14279/depositonce-6524>
- 467 Ozkan A, Kinney K, Katz L, Berberoglu H (2012) Reduction of water and energy requirement of  
468 algae cultivation using an algae biofilm photobioreactor. *Bioresour Technol* 114:542–548.  
469 <https://doi.org/10.1016/j.biortech.2012.03.055>
- 470 Padmaperuma G, Kapoore RV, Gilmour DJ, Vaidyanathan S (2018) Microbial consortia: a  
471 critical look at microalgae co-cultures for enhanced biomanufacturing. *Crit Rev*  
472 *Biotechnol* 38:690–703. <https://doi.org/10.1080/07388551.2017.1390728>
- 473 Pathak M, Sarma HK, Bhattacharyya KG, et al (2017) Characterization of a Novel Polymeric  
474 Biofloculant Produced from Bacterial Utilization of n-Hexadecane and Its Application in  
475 Removal of Heavy Metals. *Front Microbiol* 8:170.  
476 <https://doi.org/10.3389/fmicb.2017.00170>
- 477 Platt T, Gallegos CL (1980) Modelling Primary Production. In: *Primary Productivity in the Sea*.  
478 Springer US, pp 339–362
- 479 Podola B, Li T, Melkonian M (2017) Porous Substrate Bioreactors: A Paradigm Shift in  
480 Microalgal Biotechnology? *Trends Biotechnol* 35:121–132
- 481 Ralph PJ, Gademann R (2005) Rapid light curves: A powerful tool to assess photosynthetic  
482 activity. *Aquat Bot* 82:222–237. <https://doi.org/10.1016/j.aquabot.2005.02.006>
- 483 Ramsing N, Gundersen J (2011) Seawater and gases. *Limnol. Oceanogr.* 37:1307-12.



- 484 Roostaei J, Zhang Y, Gopalakrishnan K, Ochocki AJ (2018) Mixotrophic Microalgae Biofilm: A  
485 Novel Algae Cultivation Strategy for Improved Productivity and Cost-efficiency of  
486 Biofuel Feedstock Production. *Sci Rep* 8(1):1-10. [https://doi.org/10.1038/s41598-018-](https://doi.org/10.1038/s41598-018-31016-1)  
487 [31016-1](https://doi.org/10.1038/s41598-018-31016-1)
- 488 Rosenberg E, Kushmaro A, Kramarsky-Winter E, et al (2009) The role of microorganisms in  
489 coral bleaching. *ISME J* 3:139–146
- 490 Sánchez-Alvarez EL, González-Ledezma G, Bolaños Prats JA, et al (2017) Evaluating  
491 *Marinichlorella kaistiae* KAS603 cell size variation, growth and TAG accumulation  
492 resulting from rapid adaptation to highly diverse trophic and salinity cultivation regimes.  
493 *Algal Res* 25:12–24. <https://doi.org/10.1016/j.algal.2017.03.027>
- 494 Schrameyer V, Wangpraseurt D, Hill R, et al (2014) Light respiratory processes and gross  
495 photosynthesis in two scleractinian corals. *PLoS ONE* 9(10):e110814.  
496 <https://doi.org/10.1371/journal.pone.0110814>
- 497 Shnit-Orland M, Kushmaro A (2009) Coral mucus-associated bacteria: a possible first line of  
498 defense. *FEMS Microbiol Ecol* 67:371–380. [https://doi.org/10.1111/j.1574-](https://doi.org/10.1111/j.1574-6941.2008.00644.x)  
499 [6941.2008.00644.x](https://doi.org/10.1111/j.1574-6941.2008.00644.x)
- 500 Subashchandrabose SR, Ramakrishnan B, Megharaj M, et al (2011) Consortia of  
501 cyanobacteria/microalgae and bacteria: Biotechnological potential. *Biotechnol Adv*  
502 29:896–907
- 503 Tan JS, Lee Y, Chew KW, et al (2020) A review on microalgae cultivation and harvesting, and  
504 their biomass extraction processing using ionic liquids. *Bioengineering* 11:116–129.  
505 <https://doi.org/10.1080/21655979.2020.1711626>

- 506 Thompson AW, Foster RA, Krupke A, et al (2012) Unicellular cyanobacterium symbiotic with a  
507 single-celled eukaryotic alga. *Science* 337:1546–1550.  
508 <https://doi.org/10.1126/science.1222700>
- 509 Tredici MR (2010) Photobiology of microalgae mass cultures: understanding the tools for the  
510 next green revolution. *Biofuels* 1:143–162. <https://doi.org/10.4155/bfs.09.10>
- 511 Unnithan VV, Unc A, Smith GB (2014) Mini-review: A priori considerations for bacteria-algae  
512 interactions in algal biofuel systems receiving municipal wastewaters. *Algal Res* 4:35–40
- 513 Villarruel-López A, Ascencio F, Nuño K (2017) Microalgae, a potential natural functional food  
514 source—a review. *Pol J Food Nutr Sci* 67(4):251-64
- 515 Wang H, Hill RT, Zheng T, et al (2016) Effects of bacterial communities on biofuel-producing  
516 microalgae: stimulation, inhibition and harvesting. *Crit Rev Biotechnol* 36:341–352.  
517 <https://doi.org/10.3109/07388551.2014.961402>
- 518 Wangpraseurt D, Jacques SL, Petrie T, Kühl M (2016) Monte Carlo Modeling of Photon  
519 Propagation Reveals Highly Scattering Coral Tissue. *Front Plant Sci* 7:1404.  
520 <https://doi.org/10.3389/fpls.2016.01404>
- 521 Wangpraseurt D, You S, Azam F, et al (2020) Bionic 3D printed corals. *Nat Commun* 11(1):1-8.  
522 <https://doi.org/10.1038/s41467-020-15486-4>
- 523 Wyatt PJ (1969) Identification of Bacteria by Differential Light Scattering.  
524 *Nature* 221(5187):1257-8
- 525 Yurkov VV, Beatty JT (1998) Aerobic Anoxygenic Phototrophic Bacteria. *Microbiology and*  
526 *Mol Biol Rev* 62:695–724. <https://doi.org/10.1128/membr.62.3.695-724.1998>
- 527
- 528
